# Supplementary material
Source: PubMed Central journal article supplement (PMC3577989)
Supplement: NIHMS371857-supplement-01.pdf [file NIHMS371857-supplement-01.pdf]

**Supplemental Table 1(S1): Effect Sizes Characterizing Group Differences Between Family High Risk Participants and Controls\***

| <i>Study</i>                             | <i>Effect Size</i> |
|------------------------------------------|--------------------|
| <b><i>General Intelligence</i></b>       |                    |
| <b>Full-Scale or Estimate of IQ</b>      |                    |
| Maziade 2009                             | -1.583             |
| Dworkin 1993 (adolescence)               | -1.314             |
| Dworkin 1993 (childhood)                 | -1.275             |
| Fis 2008                                 | -1.024             |
| Groom 2008                               | -0.999             |
| Bhojraj 2009                             | -0.907             |
| Byrne 2003                               | -0.595             |
| Schreiber 1992                           | -0.573             |
| Goodman 1987                             | -0.544             |
| Worland 1984                             | -0.515             |
| Eack 2010                                | -0.493             |
| Ozan 2010                                | -0.465             |
| Goldstein 2000                           | -0.367             |
| Sohlberg & Yaniv 1985 (Raven's Matrices) | -0.225             |
| <b>Average IQ ES</b>                     | <b>-0.777</b>      |
| <b><i>Attention</i></b>                  |                    |
| <b>Perceptual/motor speed</b>            |                    |
| <i>Digit symbol/coding</i>               |                    |
| Asarnow 1978                             | -1.065             |
| Schreiber 1992                           | -0.553             |
| Byrne 2003                               | -0.536             |
| Fis 2008                                 | -0.530             |

|                                                       |                     |
|-------------------------------------------------------|---------------------|
| Niendam 2003                                          | -0.464              |
| Landau 1972                                           | -0.405              |
| Seidman 2006                                          | -0.271              |
| <b>Average digit symbol ES</b>                        | <b>-0.546</b>       |
| <i>Reaction Time—simple and warned</i>                |                     |
| Schreiber 1992                                        |                     |
| Simple                                                | -0.789 <sup>†</sup> |
| Warned                                                | -0.513 <sup>†</sup> |
| Maier 1994                                            |                     |
| Crossover effect (regular-irregular RT)               | -0.405              |
| Modality shift effect                                 | -0.317 <sup>†</sup> |
| <i>Speed and Capacity of Language Processing Test</i> |                     |
| <i>Speed of comprehension</i>                         |                     |
| Schubert and McNeil 2005                              | -0.159 <sup>†</sup> |
| <i>Spokes Test</i>                                    |                     |
| Asarnow 1978 (B)                                      | -2.01 <sup>†</sup>  |
| Asarnow 1978 (A)                                      | -1.02 <sup>†</sup>  |
| <i>Stroop</i>                                         |                     |
| Klemm 2006                                            |                     |
| Working speed                                         | -0.643              |
| Selectivity Scale                                     | -0.103              |
| Naming skill                                          | 0.065               |
| Asarnow 1978                                          |                     |
| Name colors (interference)                            | -0.750 <sup>†</sup> |
| Name colors                                           | -0.707 <sup>†</sup> |
| Read color words                                      | -0.075 <sup>†</sup> |
| <i>Stroop Interference score</i>                      |                     |
| Ozan 2010                                             | -0.605 <sup>†</sup> |
| Byrne 2003                                            | -0.406 <sup>†</sup> |

|                                             |                     |
|---------------------------------------------|---------------------|
| Maziade 2009                                | -0.205 <sup>†</sup> |
| Asarnow 1978                                | 0.005 <sup>†</sup>  |
| <b>Average interference score ES</b>        | <b>-0.303</b>       |
| <i>Number of errors during interference</i> |                     |
| Klemm 2006 (#errors)                        | -0.895 <sup>†</sup> |
| <i>Trail Making</i>                         |                     |
| <i>Time to execute part A</i>               |                     |
| Ozan 2010                                   | -0.976 <sup>†</sup> |
| Klemm 2006                                  | -0.732 <sup>†</sup> |
| Fis 2008                                    | -0.540 <sup>†</sup> |
| Schubert and McNeil 2005                    | -0.115 <sup>†</sup> |
| Seidman 2006                                | 0.038 <sup>†</sup>  |
| <b>Average ES time to execute part A</b>    | <b>-0.465</b>       |
| <i>Time to execute part B</i>               |                     |
| Fis 2008                                    | -0.836 <sup>†</sup> |
| Klemm 2006                                  | -0.781 <sup>†</sup> |
| Ozan 2010                                   | -0.395 <sup>†</sup> |
| Schubert and McNeil 2005                    | -0.250 <sup>†</sup> |
| Seidman 2006                                | -0.229 <sup>†</sup> |
| <b>Average ES time to execute part B</b>    | <b>-0.498</b>       |
| <i># of errors</i>                          |                     |
| Klemm 2006                                  | -0.277 <sup>†</sup> |
| <i>Visual Search</i>                        |                     |
| Neale 1984                                  |                     |
| Quadrant 1                                  | -0.206              |
| Quadrant 2                                  | -0.332              |
| Quadrant 3                                  | -0.394              |
| Quadrant 4                                  | -0.453              |
| <i>d2-concentration test</i>                |                     |

|                                                      |                       |
|------------------------------------------------------|-----------------------|
| <i># of marked signs</i>                             |                       |
| Lifshitz 1985 (sum of omissions)                     | -0.552 <sup>†**</sup> |
| Klemm 2006                                           | -0.550                |
| Schreiber 1992                                       | -0.482                |
| <b>Average d2 concentration test</b>                 | <b>-0.528</b>         |
| <i>Rate of errors to # of treated signs</i>          |                       |
| Klemm 2006                                           | 0.200                 |
| <i>Ratio minus error score</i>                       |                       |
| Schreiber 1992 (age-adj)                             | -0.470                |
| <i>Speed of comprehension</i>                        |                       |
| Byrne 2003                                           | -0.443 <sup>†</sup>   |
| <b>Short-term or working memory</b>                  |                       |
| <i>Short-term memory lag test</i>                    |                       |
| Ozan 2010 (Consonant Vowel Consonant - CVC trigrams) | -0.622                |
| Rutschmann 1980                                      |                       |
| Correct response rate words                          | -0.523                |
| Memory strength (d') words                           | -0.500                |
| Correct response rate CVCs                           | -0.478                |
| Memory strength (d') CVCs                            | -0.442                |
| <i>Arithmetic</i>                                    |                       |
| Fis 2008 (WISC-R)                                    | -0.473                |
| Sohlberg 1985                                        | -0.347                |
| Byrne 1999 (age-scaled)                              | -0.290                |
| Landau 1972                                          | -0.263                |
| <b>Average Arithmetic ES</b>                         | <b>-0.343</b>         |
| <i>Thurstone Number Facility</i>                     |                       |
| Sohlberg 1985                                        | -0.490                |
| <i>Thurstone Number Series</i>                       |                       |

|                                        |                     |
|----------------------------------------|---------------------|
| Solberg 1985                           | -0.412              |
| <i>Digit Span</i>                      |                     |
| <i>Total</i>                           |                     |
| Neale 1984 (w/ distraction)            | -0.467              |
| Myles-Worsley 2007                     | -0.386              |
| Ozan 2010 (total score)                | -0.377              |
| Maziade 2009                           | -0.365              |
| Seidman 2006                           | -0.221              |
| Neale 1984 (w/out distraction)         | -0.210              |
| Niendam 2003                           | -0.070              |
| Fis 2008 (scaled score)                | -0.032              |
| <b>Average total digit span ES</b>     | <b>-0.266</b>       |
| <i>Forwards</i>                        |                     |
| Ozan 2010 (forward)                    | -0.388              |
| Lifshitz 1985 (forwards fast)          | -0.384**            |
| Schubert and McNeil 2005 (forward)     | -0.330              |
| Cosway 2000 (forward)                  | -0.163              |
| Byrne 1999 (forward) (age-scaled)      | -0.131              |
| <b>Average forward digit span ES</b>   | <b>-0.279</b>       |
| <i>Backwards</i>                       |                     |
| Ozan 2010 (backward)                   | -0.298              |
| Byrne 1999 (backward) (age-scaled)     | -0.249              |
| Cosway 2000 (backward)                 | -0.178              |
| Lifshitz 1985 (backwards fast)         | -0.178**            |
| Schubert and McNeil 2005 (backward)    | -0.136              |
| <b>Average backwards digit span ES</b> | <b>-0.208</b>       |
| <i>Dichotic Listening</i>              |                     |
| Asarnow 1978 (# of errors)             |                     |
| # of voices=1                          | -0.459 <sup>†</sup> |

|                                                |                      |
|------------------------------------------------|----------------------|
| # of voices=3                                  | -0.729 <sup>†</sup>  |
| # of voices=7                                  | -0.814 <sup>†</sup>  |
| # of voices=13                                 | -0.582 <sup>†</sup>  |
| <i>Working Memory Span</i>                     |                      |
| <i>Counting Span</i>                           |                      |
| Davalos 2004                                   | -0.548               |
| <i>Sentence Span</i>                           |                      |
| Davalos 2004                                   | -0.478               |
| <i>Hayling Sentence Completion Test (HSCT)</i> |                      |
| Byrne 2003                                     |                      |
| Section A Time                                 | -0.472 <sup>†§</sup> |
| Type B errors                                  | -0.412 <sup>†§</sup> |
| Total errors                                   | -0.261 <sup>†§</sup> |
| Section B time                                 | -0.171 <sup>†§</sup> |
| Time difference (B-A)                          | -0.098               |
| Type A errors                                  | -0.010 <sup>†§</sup> |
| Groom 2008                                     |                      |
| Response initiation speed (RT)                 | -0.415 <sup>†</sup>  |
| Response inhibition speed (RT)                 | -0.415 <sup>†</sup>  |
| <i>Total spatial span</i>                      |                      |
| Maziade 2009                                   | -0.441               |
| Myles-Worsley 2007                             | -0.168               |
| <i>Letter-Number sequencing</i>                |                      |
| Myles-Worsley 2007                             | -0.373               |
| <b>Vigilance and sustained attention</b>       |                      |
| <i>Simple CPTs omissions/commissions</i>       |                      |
| Asarnow 1978 (Errors of omission)              | -0.483 <sup>†</sup>  |
| Cohler 1977 (Errors of commission)             | -0.422 <sup>†</sup>  |
| Cohler 1977 (Errors of omission)               | -0.417 <sup>†</sup>  |

|                                                        |                     |
|--------------------------------------------------------|---------------------|
| Asarnow 1978 (Errors of commission)                    | 0.061 <sup>†</sup>  |
| <i>Difficult CPTs</i>                                  |                     |
| <i>Double Digit CPT</i>                                |                     |
| Maziade 2009                                           |                     |
| CPT II-hit reaction time block change                  | -0.387              |
| CPT II-hit standard error block change                 | -0.195              |
| CPT-II omissions                                       | -0.038 <sup>†</sup> |
| CPT-II commissions                                     | 0.381 <sup>†</sup>  |
| CPT-II detectability d'                                | 0.559               |
| <i>CPT-IP Numbers</i>                                  |                     |
| Myles-Worsley 2007 (fast)                              | -0.589              |
| Groom 2008                                             | -0.562              |
| Cosway 2002 ( <i>d'</i> detectability, no distraction) | -0.202              |
| Cosway 2002 ( <i>d'</i> detectability, distraction)    | -0.058              |
| Seidman 2006                                           | 0.000               |
| <b>Average CPT-IP numbers d'</b>                       | <b>-0.282</b>       |
| <i>CPT-IP Shapes</i>                                   |                     |
| Cosway 2002 ( <i>d'</i> detectability, distraction)    | -0.430              |
| Cosway 2002 ( <i>d'</i> detectability, no distraction) | -0.376              |
| Myles-Worsley 2007                                     | -0.365              |
| Groom 2008                                             | -0.139              |
| Seidman 2006                                           | 0.000               |
| <b>Average CPT-IP shapes d'</b>                        | <b>-0.262</b>       |
| <i>Tova CPT</i>                                        |                     |
| Ozan 2010                                              |                     |
| Omission errors                                        | -0.371 <sup>†</sup> |
| Response time                                          | -0.246 <sup>†</sup> |
| Commission errors                                      | -0.067 <sup>†</sup> |
| <b>Other attention processes</b>                       |                     |

|                                             |                     |
|---------------------------------------------|---------------------|
| <i>Selective Attention</i>                  |                     |
| Schubert and McNeil 2005                    |                     |
| Compound hits                               | -0.470              |
| Correct hits                                | -0.416              |
| Errors                                      | -0.003 <sup>†</sup> |
| <i>Stop Task</i>                            |                     |
| Davalos 2004                                | -0.816 <sup>†</sup> |
| <i>Span of Apprehension</i>                 |                     |
| Asarnow 1978 (Number of correct detections) |                     |
| 1 array element                             | -0.100              |
| 3 array elements                            | -0.396              |
| 5 array elements                            | -1.012              |
| 10 array elements                           | -1.450              |
| <b><i>Executive functioning</i></b>         |                     |
| <b>Concept Formation and Abstraction</b>    |                     |
| <i>Concept Attainment</i>                   |                     |
| Asarnow 1978 (Errors to criterion)          |                     |
| 3 stimulus dimensions                       | -1.731 <sup>†</sup> |
| 4 stimulus dimensions                       | -1.677 <sup>†</sup> |
| 5 stimulus dimensions                       | -0.781 <sup>†</sup> |
| 6 stimulus dimensions                       | -0.981 <sup>†</sup> |
| <i>Object Sorting Test</i>                  |                     |
| Neale 1982                                  |                     |
| Complexive responses                        | -0.397 <sup>†</sup> |
| Superordinate response                      | -0.338              |
| Thematic responses                          | -0.224 <sup>†</sup> |
| Vague responses                             | -0.108              |
| <i>Picture Arrangement</i>                  |                     |
| Ott 1998                                    | -0.642              |



|                                                       |                     |
|-------------------------------------------------------|---------------------|
| Niendam 2003                                          | -0.604              |
| Fis 2008                                              | -0.325              |
| <b>Average picture arrangement ES</b>                 | <b>-0.524</b>       |
| <i>Wisconsin Card Sort (WCST)</i>                     |                     |
| <i>Perseverative errors/responses</i>                 |                     |
| Wolf 2002 (errors)                                    | -0.645 <sup>†</sup> |
| Wolf 2002 (responses)                                 | -0.634 <sup>†</sup> |
| Klemm 2006                                            | -0.603 <sup>†</sup> |
| Schubert and McNeil 2005                              | -0.119 <sup>†</sup> |
| <b>Average WCST perseverative errors/responses ES</b> | <b>-0.500</b>       |
| <i>Total errors</i>                                   |                     |
| Wolf 2002                                             | -0.652 <sup>†</sup> |
| Ozan 2010                                             | -0.524 <sup>†</sup> |
| Maziade 2009                                          | -0.132 <sup>†</sup> |
| Schubert and McNeil 2005 (%)                          | -0.047 <sup>†</sup> |
| <b>Average WCST total errors ES</b>                   | <b>-0.339</b>       |
| <i>Trials to first category</i>                       |                     |
| Ozan 2010                                             | -0.767 <sup>†</sup> |
| Maziade 2009                                          | -0.176 <sup>†</sup> |
| <i>Failure to maintain set</i>                        |                     |
| Maziade 2009                                          | -0.595 <sup>†</sup> |
| Wolf 2002                                             | -0.353 <sup>†</sup> |
| <i>Learning to learn</i>                              |                     |
| Maziade 2009                                          | 0.248               |
| <i>% correct trials</i>                               |                     |
| Klemm 2006                                            | -0.759              |
| Ozan 2010 (Total Correct Score)                       | -0.524              |
| <i>Number of complete categories</i>                  |                     |

|                                                       |                     |
|-------------------------------------------------------|---------------------|
| Ozan 2010                                             | -0.789              |
| Klemm 2006                                            | -0.600              |
| Wolf 2002                                             | -0.412              |
| Maziade 2009                                          | 0.672               |
| <b>Average WCST complete categories ES</b>            | <b>-0.282</b>       |
| <i>Reitan-Indiana Neuropsychological Test Battery</i> |                     |
| Fis 2008                                              |                     |
| Color Form Test                                       | -0.768 <sup>†</sup> |
| Progressive Figures Test                              | -0.708 <sup>†</sup> |
| <i>Tower of London</i>                                |                     |
| Maziade 2009                                          |                     |
| Total rule violations                                 | -0.780 <sup>†</sup> |
| Total # of problem solved in min moves                | -0.495              |
| Total time violations                                 | 0.074               |
| Mittenecker Perseveration Test                        |                     |
| Schreiber 1992                                        | -0.669              |
| <b><i>Verbal/linguistic ability</i></b>               |                     |
| <i>Verbal IQ</i>                                      |                     |
| Ott 1998                                              | -1.104              |
| Fis 2008                                              | -0.709              |
| Schreiber 1992                                        | -0.592              |
| Neale 1984                                            | -0.473              |
| Sohlberg 1985                                         | -0.123              |
| <b>Average verbal score ES</b>                        | <b>-0.720</b>       |
| <i>Comprehension</i>                                  |                     |
| Fis 2008 (WISC-R)                                     | -0.709              |
| Schreiber 1992                                        | -0.696              |
| Ott 1998                                              | -0.646              |
| Niendam 2003                                          | -0.045              |

|                                           |                     |
|-------------------------------------------|---------------------|
| Sohlberg 1985                             | 0.038               |
| <b>Average comprehension ES</b>           | <b>-0.412</b>       |
| <i>Grammatical Reasoning</i>              |                     |
| Schubert and McNeil 2005                  |                     |
| Correct rejections                        | -0.616              |
| Correct hits                              | -0.343              |
| Level of logical difficulty               | -0.262              |
| Errors                                    | -0.242 <sup>†</sup> |
| <i>Information</i>                        |                     |
| Fis 2008                                  | -0.564              |
| Schreiber 1993                            | -0.502              |
| Landau 1972                               | -0.409              |
| Niendam 2003                              | -0.155              |
| Sohlberg 1985                             | -0.091              |
| <b>Average information ES</b>             | <b>-0.344</b>       |
| <i>Similarities (WISC-R)</i>              |                     |
| Schreiber 1992                            | -0.742              |
| Fis 2008                                  | -0.614              |
| Sohlberg 1985                             | 0.242               |
| <b>Average similarities ES</b>            | <b>-0.371</b>       |
| <i>NART Reading</i>                       |                     |
| Byrne 2003                                | -0.773              |
| Marjoram 2006                             | -0.651              |
| <i>WRAT-3 Reading</i>                     |                     |
| Seidman 2006 (standard score)             | -0.669              |
| <b>Average NART &amp; WRAT Reading ES</b> | <b>-0.698</b>       |
| <i>Token Test</i>                         |                     |
| Byrne 2003                                | -0.251              |

|                                   |                     |
|-----------------------------------|---------------------|
| <i>Verbal Fluency</i>             |                     |
| <i>Total verbal fluency</i>       |                     |
| Bhojraj 2009 (controlling for IQ) | -0.450              |
| Seidman 2006 (raw score)          | -0.295              |
| Schubert and McNeil 2005          | 0.241               |
| <b>Average total fluency ES</b>   | <b>-0.168</b>       |
| <i>Letter Fluency</i>             |                     |
| Ozan 2010                         | -0.575              |
| Bhojraj 2009 (controlling for IQ) | -0.445              |
| Maziade 2009                      | -0.431              |
| Byrne 2003                        | -0.262              |
| Groom 2008                        | -0.170              |
| <b>Average letter fluency ES</b>  | <b>-0.377</b>       |
| <i>Category fluency</i>           |                     |
| Byrne 2003                        | -0.487              |
| Maziade 2009                      | -0.366              |
| <i>Vocabulary</i>                 |                     |
| Ott 1998                          | -1.153              |
| Davalos 2004 (WISC)               | -0.762              |
| Seidman 2006 (scaled score)       | -0.682              |
| Niendam 2003 (WISC)               | -0.615              |
| Byrne 2003 (WAIS-R)               | -0.533 <sup>s</sup> |
| <b>Average vocabulary ES</b>      | <b>-0.749</b>       |
| <i>Thurstone Verbal Meaning</i>   |                     |
| Sohlberg 1985                     |                     |
| Letter Series                     | -0.538              |
| Word grouping                     | -0.124              |
| Verbal meaning                    | -0.043              |
| Spot the word test                |                     |

|                                              |                     |
|----------------------------------------------|---------------------|
| Byrne 2003                                   | -0.623              |
| <b><i>Visual spatial ability</i></b>         |                     |
| <i>Performance IQ</i>                        |                     |
| Fis 2008                                     | -1.172              |
| Ott 1998                                     | -0.866              |
| Byrne 2003                                   | -0.544              |
| Neale 1984 (WISC)                            | -0.449              |
| Schreiber 1992                               | -0.230              |
| <b>Average performance IQ ES</b>             | <b>-0.652</b>       |
| <i>Block Design</i>                          |                     |
| Fis 2008 (WISC-R)                            | -1.262              |
| Cosway 2000                                  | -0.705              |
| Seidman 2006 (scaled score)                  | -0.234              |
| Davalos 2004                                 | -0.242              |
| Schubert and McNeil 2005                     | -0.195              |
| Niendam 2003                                 | -0.193              |
| <b>Average Block Design ES</b>               | <b>-0.472</b>       |
| <i>Picture completion</i>                    |                     |
| Fis 2008                                     | -0.936              |
| <i>Object Assembly</i>                       |                     |
| Fis 2008 (WISC-R)                            | -1.113              |
| <i>Paper Folding</i>                         |                     |
| Davalos 2004                                 | -0.115              |
| <i>Bender Gestalt</i>                        |                     |
| Sohlberg 1985                                | -0.282 <sup>†</sup> |
| <i>Embedded Figures Test (# of failures)</i> |                     |
| Cohler 1977                                  | -0.245 <sup>†</sup> |
| <i>Visual-Spatial Orientation and Memory</i> |                     |

|                                         |                       |
|-----------------------------------------|-----------------------|
| Lifshitz 1985                           |                       |
| Total errors                            | -0.421 <sup>***</sup> |
| Total time to execute                   | -0.384 <sup>***</sup> |
| Total time learning                     | -0.217 <sup>***</sup> |
| Total # of trials                       | -0.168 <sup>***</sup> |
| <b><i>Social cognition</i></b>          |                       |
| <b>Emotion Perception</b>               |                       |
| <i>Penn Emotion Recognition Test-40</i> |                       |
| Eack 2010                               |                       |
| Speed (total)                           | -0.725 <sup>†</sup>   |
| Speed (neutral)                         | -0.613 <sup>†</sup>   |
| Speed (emotional)                       | -0.545 <sup>†</sup>   |
| Accuracy (neutral)                      | -0.420                |
| Total accuracy                          | -0.310                |
| Accuracy (emotional)                    | -0.144                |
| <i>Emotion perception</i>               |                       |
| Davalos 2004                            |                       |
| Adult                                   | -0.073                |
| Children                                | -0.030                |
| <b>Theory of mind</b>                   |                       |
| <i>Hinting Task</i>                     |                       |
| Marjoram 2006                           | -0.462 <sup>**</sup>  |
| <i>Self Monitoring task</i>             |                       |
| Marjoram 2006                           | -0.177 <sup>**</sup>  |
| <i>Brune Cartoon Task</i>               |                       |
| Marjoram 2006                           | -0.129 <sup>**</sup>  |
| <b><i>Declarative memory</i></b>        |                       |
| <b>Verbal Story and List Recall</b>     |                       |

|                                                  |                       |
|--------------------------------------------------|-----------------------|
| <i>Story Recall</i>                              |                       |
| Lifshitz 1985                                    |                       |
| Sum of distracted omissions                      | -0.572 <sup>†**</sup> |
| Sum of nondistracted omissions                   | -0.473 <sup>†**</sup> |
| Total nondistracted errors                       | -0.307 <sup>†**</sup> |
| Total sum of errors                              | -0.071 <sup>†**</sup> |
| Total distracted errors                          | -0.016 <sup>†**</sup> |
| <i>Logical Memory (WMS) Story recall</i>         |                       |
| Myles-Worsley 2007                               |                       |
| Immediate recall                                 | -0.672                |
| Bonner-Jackson 2007 (scaled)                     | -0.471                |
| Delayed recall                                   | -0.238                |
| Seidman 2006 (percentage)                        | -0.231                |
| <b>Average Story Recall ES</b>                   | <b>-0.403</b>         |
| <i>California Verbal Learning Test (CVLT)</i>    |                       |
| <i>Short-delay recall</i>                        |                       |
| Bonner-Jackson 2007                              | -0.350                |
| Maziade 2009                                     |                       |
| Total recall                                     | -0.407                |
| Delayed recall                                   | -0.697                |
| Recognition                                      | -0.156                |
| <i>Rey Auditory Verbal Learning Test (RAVLT)</i> |                       |
| <i>Immediate recall</i>                          |                       |
| Maziade 2009                                     | -0.792                |
| <i>Recognition</i>                               |                       |
| Ozan 2010 (percent score)                        | -0.748                |
| Maziade 2009                                     | 0.140                 |
| <i>Trial 1</i>                                   |                       |

|                                                              |                     |
|--------------------------------------------------------------|---------------------|
| Byrne 2003                                                   | -0.653              |
| <i>Delayed Recall</i>                                        |                     |
| Maziade 2009                                                 | -0.732              |
| Ozan 2010                                                    | -0.668              |
| Byrne 2003                                                   | -0.509              |
| <b>Average RAVLT Delayed Recall ES</b>                       | <b>-0.636</b>       |
| <i>Recall B</i>                                              |                     |
| Byrne 2003                                                   | -0.274              |
| <i>Recognition List A</i>                                    |                     |
| Byrne 2003                                                   | -0.123              |
| <i>Recognition List B</i>                                    |                     |
| Byrne 2003                                                   | -0.121              |
| <i>Total T1-5</i>                                            |                     |
| Ozan 2010                                                    | -0.618              |
| Groom 2008                                                   | -0.589              |
| Byrne 2003                                                   | -0.546              |
| <b>Average T1-T5 ES</b>                                      | <b>-0.584</b>       |
| <i>Retention (%)</i>                                         |                     |
| Groom 2008                                                   | -0.390              |
| <i>Retrieval</i>                                             |                     |
| Groom 2008                                                   | -0.230 <sup>†</sup> |
| <i>True positive</i>                                         |                     |
| Ozan 2010                                                    | -0.471              |
| <i>Rivermead Behavioral Memory Test (standardized score)</i> |                     |
| Byrne 2003                                                   |                     |
| Delayed                                                      | -0.656              |
| Immediate                                                    | -0.564              |
| Standardized score                                           | -0.503 <sup>§</sup> |
| <i>Word Pairs Test</i>                                       |                     |



|                                         |                     |
|-----------------------------------------|---------------------|
| Schubert and McNeil 2005                |                     |
| Delayed                                 | -0.786              |
| Immediate                               | -0.601              |
| <b>Visual Recall</b>                    |                     |
| <i>Family pictures (WMS)</i>            |                     |
| Bonner-Jackson 2007 (immediate, scaled) | -0.850              |
| <i>Memory for Designs</i>               |                     |
| Orvaschel 1979                          | -0.088**            |
| <i>Visual Reproductions</i>             |                     |
| Byrne 2003                              |                     |
| Delayed                                 | -0.653 <sup>§</sup> |
| Immediate                               | -0.583 <sup>§</sup> |
| <i>Visuospatial memory</i>              |                     |
| Myles-Worsley 2007                      |                     |
| Visual recognition                      | -0.206**            |
| Faces recognition                       | 0.189**             |
| <b>Motor functioning</b>                |                     |
| <i>Finger Tapping</i>                   |                     |
| Schubert and McNeil 2005                | -0.051              |
| <i>Purdue-both Hands</i>                |                     |
| Maziade 2009                            | -0.147              |
| <i>Grooved pegboard</i>                 |                     |
| Seidman 2006                            |                     |
| Right (seconds)                         | -0.071              |
| Left (seconds)                          | 0.022               |
| <b>Cerebral asymmetry</b>               |                     |
| <i>Story Comprehension Test</i>         |                     |
| Hallett 1986                            |                     |
| Both                                    | -0.435              |

|                                     |        |
|-------------------------------------|--------|
| Right                               | -0.238 |
| Left                                | 0.205  |
| <i>Auditory Recall Test</i>         |        |
| Hallett 1986                        |        |
| Both                                | -0.560 |
| Left                                | -0.196 |
| Right                               | -0.155 |
| <i>Verbal Dichotic Listening</i>    |        |
| Hallett 1986 (matched on verbal IQ) |        |
| Absolute ear advantage              | -0.553 |
| Right ear score                     | -0.045 |
| Mean score                          | 0.214  |
| Left ear score                      | 0.465  |
| <i>Handedness</i>                   |        |
| Byrne 1999                          | 0.006  |

\*Average Effect Sizes (ESs) in Cohen's *d* are calculated when 3 or more studies with the same tests and variables have been used to compare Family High Risk (FHR) and Control subjects

\*\* Subgroups within the high-risk (HR) group have been pooled to create an overall HR group average score

† Effect sizes are inverted such that a negative value denotes poor performance in the HR group.

§ Cohen's *d* computed from hedges *g*

Across studies, within test (e.g., IQ), ESs are ordered from larger to smaller
